# Supplementary material
Source: PubMed Central journal article supplement (PMC2219296)

**A.** Comparison of relative uterine size of 6-8 wk old  $Lepr^{db}$  (A-C) [mutant] and  $Lepr^{db/m}$  (D-F) [control] mice prior to  $E_2$  priming (A). The  $Lepr^{db}$  uterine histological (H&E) phenotype has been described as infantile with a predominance of stroma and immature glandular epithelium (B) compared to age and estrous cycle matched controls (E) [H&E 10X magnification]. Five days following subcutaneous  $E_2$  implant placement,  $Lepr^{db}$  (C) demonstrated a similar epithelial glandular and stromal proportion and architecture as controls (F) during microscopic observation (H&E, 60X magnification). Scale bar: 100  $\mu$ m

**B.** Graphical comparison of relative uterine weights of  $Lepr^{db/m}$  and  $Lepr^{db}$  (N=3) mice before and after estrogen exposure as described previously. Prior to estrogen exposure, the mean uterine weight of  $Lepr^{db}$  was significantly lower than  $Lepr^{db/m}$  (ANOVA  $p < 0.01$ ). However, uterine weights of both genotypes were similar following 5 days of estrogen treatment.  $Lepr^{db/m}$  and  $Lepr^{db}$  represent db mutant controls and db mutants respectively. The notation + $E_2$  designates 5 days of estrogen exposure in each mouse group. Different letters represent different letters at the level of  $p < 0.01$ .

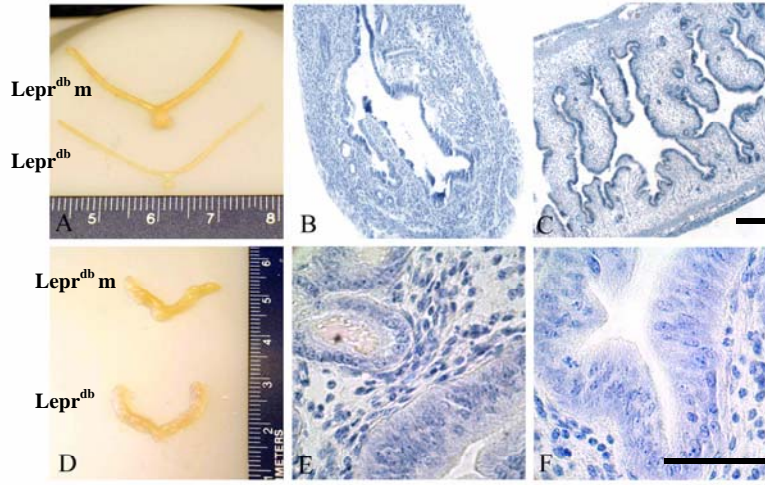

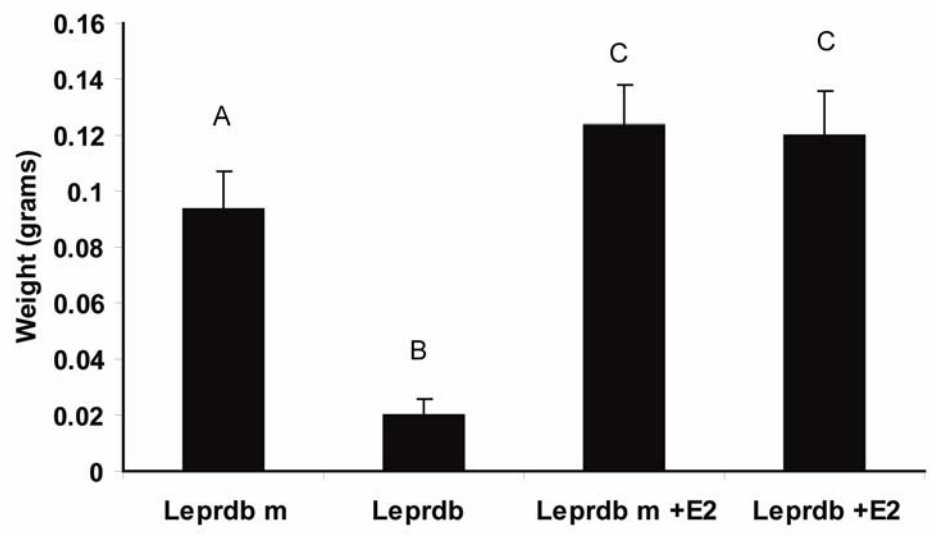

Supplement: endo_en.2007-1225_2.pdf [file endo_en.2007-1225_2.pdf]
