# Supplementary material
Source: PubMed Central journal article supplement (PMC2219296)

Immunohistochemical comparison of the relative VEGF and phospho-histone-3 (PH3) expression in endometriosis-like lesions following treatment with adeno *sFlt-1* and adeno GFP (control) in WT C67BL6 female hosts 7 days after uterine tissue transfer. Animals were treated with  $1 \times 10^8$  PFU in each group 4 hours prior to syngeneic uterine transfer. Antagonism of the VEGF by adeno sFlt1 resulted in markedly decreased gross vascularity in endometriosis-like lesions (A) compared to control animals (B). Histological and immunohistochemical analysis demonstrated significant fibrosis, necrosis, a paucity of viable glandular or stromal epithelium, and decreased VEGF (C) and PH3 (E) expression in the *sFlt-1* treatment group compared to control animals (D and F). Microscopic images are at 60X magnification. Scale bar: 100  $\mu$ m.

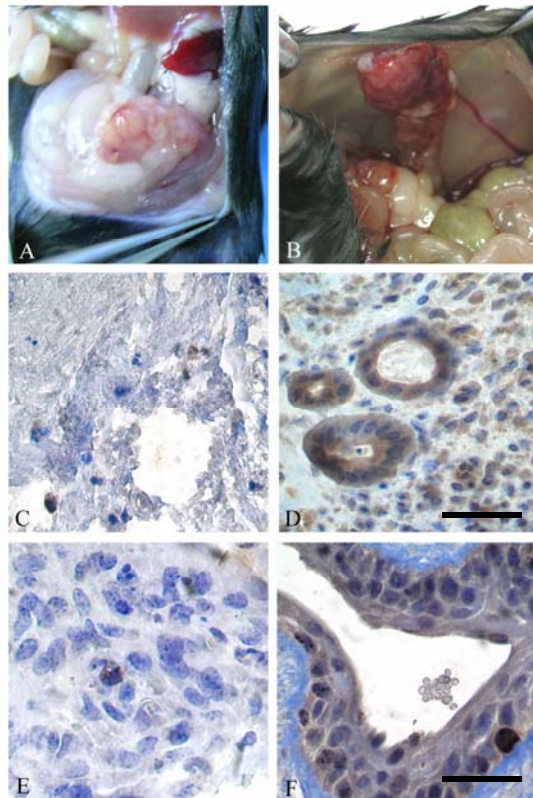

Supplement: endo_en.2007-1225_3.pdf [file endo_en.2007-1225_3.pdf]
